# Supplementary material for: ASF1B May Regulate the Tumor Microenvironment and Epithelial-mesenchymal Transition in Malignant Mesothelioma to Induce the Differentiation of Sarcomatoid Phenotype as a Prognosis Target
Source: Research Square preprint supplement (doi:10.21203/rs.3.rs-146040/v1), 2021-01-15
Supplement: Supplementary file 1 [file 64bab544098b7055609537e1.xlsx]

## Sheet: Cibersortx
Mixture	B cells naive	B cells memory	Plasma cells	T cells CD8	T cells CD4 naive	T cells CD4 memory resting	T cells CD4 memory activated	T cells follicular helper	T cells regulatory (Tregs)	T cells gamma delta	NK cells resting	NK cells activated	Monocytes	Macrophages M0	Macrophages M1	Macrophages M2	Dendritic cells resting	Dendritic cells activated	Mast cells resting	Mast cells activated	Eosinophils	Neutrophils	P-value	Correlation	RMSE
GSM1235016	0.0804463	0	0.020912	0.00639891	0.0139436	0.0912545	0.041692	0.0624661	0	0.155042	0	0	0.0298527	0	0.0384079	0.140674	0.0137593	0.0363218	0	0.153652	0.0422241	0.0729518	0	0.230043	0.989184
GSM1235018	0.00349945	0	0.0140388	0	0.000484894	0.0983988	0	0.0207924	0	0.0487719	0	0.0311207	0.0798193	0.0554937	0.0316136	0.0936905	0.0112549	0.0269343	0	0.389865	0.0334481	0.0607739	0	0.431748	0.911407
GSM1235020	0.0350607	0	0.0246531	0.0751423	0	0.174391	0.00709394	0.0385048	0	0.070261	0.00363642	0.0275227	0.0151563	0	0.0768609	0.136053	0.0495385	0.0670441	0	0.140859	0.0266578	0.0315646	0	0.259992	0.97849
GSM1235022	0.0233045	0	0.0199381	0.0247396	0	0.138449	0.0304954	0.0170172	0	0.148033	0	0.00174988	0	0.0782468	0.00566373	0.126118	0.0181845	0.0894841	0	0.13484	0.0785446	0.0651912	0	0.157682	1.01932
GSM1235024	0.0429245	0	0.0211886	0.114455	0	0.0563051	0.000574404	0.0917484	0	0.0965843	0	0.00221291	0.0338134	0	0.0391885	0.206237	0	0.0666984	0	0.147928	0.0204396	0.0597021	0	0.137468	1.02832
GSM1235026	0.0135389	0	0.0188192	0.0571663	0	0.109537	0.0269683	0.0235493	0	0.0733419	0	0.0858669	0.0619746	0.0138443	0.0509963	0.0785934	0.0217605	0.0378621	0	0.252668	0.0208419	0.0526707	0	0.458317	0.888671
GSM1235028	0.0092966	0	0.0248015	0	0.000440021	0.212186	0.00716959	0.036437	0	0.0987979	0	0.0285915	0.164877	0.0352641	0.064486	0.0429911	0.0223587	0.0293177	0.0229888	0.0498224	0.0274166	0.122757	0	0.377651	0.926551
GSM1235030	0	0.032646	0.0160289	0	0.0797949	0.0627766	0.0453669	0.0602054	0	0.0194594	0.116102	0.0290517	0.0310296	0.0292755	0.0706568	0.124236	0.0266484	0.0344683	0	0.1373	0.0510146	0.0339389	0	0.182937	1.01028
GSM1235032	0.0197593	0	0.026215	0.0404987	0	0.284369	0	0.0314583	0	0	0	0.0766313	0.00721793	0	0.0311734	0.16687	0.0477095	0.0973511	0.0052554	0.0661809	0.0584248	0.0408861	0	0.162396	1.01723
GSM1235034	0.0411256	0	0.0302931	0	0	0.0959488	0.0396602	0	0	0.0506899	0.0656109	0	0.12482	0.0430853	0.031379	0.0931447	0.04052	0.0439746	0	0.0874716	0.0430352	0.169241	0	0.296251	0.963534
GSM1235036	0	0.0267779	0.0232247	0.0475012	0	0.141733	0	0.023022	0	0.0792518	0.0176395	0.0163853	0.0492072	0.0207081	0.0732924	0.143677	0.0270855	0.0235245	0	0.184915	0.0432892	0.0587651	0	0.170016	1.01835
GSM1235038	0.00661905	0	0.012263	0	0.0137772	0.177359	0.0190944	0.0193556	0	0.10989	0.0564113	0.0159368	0.0281731	0.0324348	0.0619451	0.184186	0.0282046	0.0176332	0.0661914	0	0.0874439	0.0630812	0	0.397779	0.91661
GSM1235040	0	0.0117865	0.0358415	0.0547414	0	0.153151	0.0029048	0.0561112	0	0.0639648	0.00538647	0.0408968	0.103303	0	0.0404007	0.195487	0.0444844	0.0524572	0	0.06213	0.0660584	0.0108953	0	0.392488	0.918909
GSM1235042	0.0540834	0	0.0275769	0	0.0209412	0.199312	0.00272937	0.0179805	0	0.119188	0	0.00454538	0.0728587	0	0.0588143	0.116758	0.0371074	0.0322534	0.00298797	0.139341	0.0495277	0.0439954	0	0.191488	1.00365
GSM1235044	0.0174785	0	0.0209175	0	0	0.218425	0.00790912	0.0326664	0	0.0853182	0.0621685	0	0.0307294	0	0.018983	0.15814	0.0502288	0.054875	0	0.163828	0.0582026	0.0201299	0	0.422847	0.905396
GSM1235046	0	0.0210401	0.0347121	0.0817112	0	0.159278	0	0.0632069	0.0457444	0	0.0113764	0.0177991	0.0274555	0	0.0628821	0.181886	0.0148365	0.0688744	0	0.077485	0.066535	0.0651774	0	0.231991	0.986792
GSM1235048	0.0317703	0	0.0244697	0	0.0194614	0.167691	0	0.0504911	0	0.106138	0.00378786	0	0.101334	0.0917947	0.037896	0.103756	0.0412566	0.03547	0.00523558	0.108321	0.0170067	0.05412	0	0.243618	0.981413
GSM1235050	0.00122118	0.00481089	0.0139749	0.0152988	0	0.0734	0	0.045204	0	0.0630186	0	0.0354182	0.125291	0.0783447	0.0338015	0.107633	0.0322325	0.0463203	0	0.169117	0.0544685	0.100444	0	0.238221	0.9915
GSM1235052	0	0.0468507	0.0240044	0.0890337	0	0.0974826	0	0.0906609	0	0.025414	0.0487472	0	0.0217306	0	0.0804382	0.144942	0.0780939	0.0563967	0	0.0720799	0.0473765	0.0767488	0	0.28118	0.96569
GSM1235054	0.0253304	0	0.0179319	0	0.0323007	0.0753648	0	0.0482429	0	0.074719	0.0326021	0.0190785	0.0530572	0.0850972	0.0232011	0.112401	0.0481574	0.0423194	0	0.219661	0.0160366	0.0744988	0	0.176995	1.01903
GSM1235056	0.0451719	0	0.0221834	0	0.0442777	0.123356	0.0369798	0.0718637	0	0.118842	0	0.017682	0.118667	0	0.0478696	0.0702571	0.060175	0.0444964	0	0.101926	0.0249289	0.0513236	0	0.316666	0.951163
GSM1235058	0.010963	0.013281	0.0119018	0.0964917	0	0.0866714	0.0191506	0.0293813	0	0.0578793	0	0.030454	0.0260712	0	0.112427	0.186031	0.122939	0.0252347	0	0.0946613	0.0212635	0.0551986	0	0.464518	0.886006
GSM1235060	0.00955101	0.00856085	0.016632	0.0717255	0	0.163909	0.00105831	0.0267812	0	0.115591	0	0	0.0448128	0	0.0270929	0.219933	0.0582104	0.0509371	0	0.0557824	0.0708256	0.0585972	0	0.357484	0.934004
GSM1235064	0.0464563	0	0.0026184	0.16164	0	0.108968	0.0073716	0.0407986	0	0	0.043868	0	0.110223	0.00559102	0.0403739	0.136372	0.0991705	0.0655412	0	0.0551141	0.0326763	0.0432176	0	0.286699	0.962744
GSM1235066	5.43747e-05	0.0411818	0	0.245689	0	0.0212755	0.028492	0	0	0	0	0.00230136	0.0370353	0	0.0150671	0.223244	0.0466403	0.104676	0	0.131427	0.0580908	0.0448255	0	0.159375	1.01692
GSM1235068	0	0.0927198	0.0183398	0.119349	0	0.0275427	0.0673092	0.0721187	0	0.0477961	0.0274249	0	0.00883801	0	0.0696802	0.176338	0.0416834	0.0325751	0	0.104712	0.0537033	0.0398702	0	0.241226	0.981042
GSM1235070	0.00391975	0.00731709	0.0177908	0.106948	0	0.127075	0.0211701	0.0395744	0	0.0399844	0	0.00845237	0.0357965	0	0.0764718	0.185266	0.0936482	0.0495073	0	0.0593448	0.0559226	0.0718108	0	0.275118	0.968379
GSM1235072	0	0.0189297	0.0111474	0	0.0593794	0.150166	0.0579873	0.0116187	0	0	0.210772	0	0.108397	0.048984	0.0558919	0.104684	0.0264127	0.0284203	0	0.051572	0.0432773	0.0123602	0	0.279586	0.969139
GSM1235076	0.0146133	0.010177	0.00132798	0.149368	0	0.0851209	0.0235141	0.00101079	0	0.0214685	0.0552638	0	0.0518633	0	0.0547205	0.141375	0.156079	0.0394416	0	0.0469782	0.0379774	0.109701	0	0.409127	0.911614
GSM1235078	0.0309213	0	0.00810257	0.202653	0	0.0781702	0.0347963	0.00488817	0	0	0	0	0.0292917	0	0.0734124	0.207218	0.139072	0.0277056	0	0.0679817	0.0406461	0.055141	0	0.276049	0.96783
GSM1235080	0.0156143	0.00230137	0.00298817	0.158894	0	0.0540188	0.0131417	0.0285913	0	0.0454213	0.052653	0	0.0532001	0	0.0283861	0.189995	0.114013	0.0512292	0	0.0767035	0.0300669	0.0827824	0	0.426212	0.904038
GSM1235082	0	0.109991	0.00761407	0.136843	0	0	0.0293777	0.0346745	0	0.0564592	0	0.0309701	0.0080005	0	0.0388778	0.162703	0.0789564	0.0599482	0	0.0847786	0.056259	0.104547	0	0.194893	1.00079
GSM1235086	0.0154149	0	0.00922642	0.104814	0	0.225173	0	0.0238891	0	0.0458916	0.0164112	0.0450301	0.0647288	0	0.0305904	0.119994	0.0389468	0.0330596	0	0.170993	0.046436	0.00940075	0	0.369446	0.93133
GSM1235088	0	0.00244786	0.0221682	0.105571	0	0.167961	0.0058761	0.0176015	0	0	0	0.016345	0.0574442	0	0.0359429	0.1163	0.102034	0.0407044	0	0.210378	0.0617586	0.037467	0	0.204702	1.00241
GSM1235090	0.0736628	0	0	0.242931	0	0	0.00461809	0	0.021181	0.0670424	0	0	0.0228103	0	0.0387632	0.239109	0.0735186	0.0977985	0.013931	0.0535166	0.0185737	0.032544	0	0.325936	0.948116
GSM1235017	0	0.0106468	0.00717364	0.1997	0	0	0.0151135	0.048734	0.00162277	0.195092	0	0.0921967	0.0457504	0.0683045	0.0630641	0.123213	0.0368975	0	0	0.0773134	0.00639434	0.00878343	0	0.514185	0.857004
GSM1235019	0	0.0285391	0.0200571	0.0104707	0	0.117457	0	0.0488913	0	0.0134742	0	0.0591478	0.0998766	0	0.0174345	0.256562	0.00219873	0.04564	0	0.202501	0.026578	0.0511719	0	0.312989	0.957566
GSM1235021	0.0288197	0	0.0236734	0.0544468	0	0.028443	0	0.105032	0	0.269142	0	0.122581	0	0.0104875	0.112047	0.139255	0.00470625	0.0116633	0	0.0793253	0	0.0103783	0	0.446508	0.899574
GSM1235023	0.00244267	0	0.00444124	0	0	0.0336725	0	0.0142302	0.0146484	0.0845532	0	0.00652425	0	0.580549	0.0264266	0.103382	0.0125923	0	0	0.0981469	0	0.0183911	0	0.781687	0.641762
GSM1235025	0.0395178	0	0.0168651	0.110346	0	0.0850032	0	0.100226	0.0144176	0	0	0.00755379	0.0261166	0	0.0272046	0.387406	0.0338651	0.00928641	0	0.0964094	0.00734762	0.0384342	0	0.25482	0.980357
GSM1235027	0.0395059	0	0.0483029	0.0144101	0	0.110446	0	0.0379692	0.0156157	0.11213	0	0.0798046	0	0	0.0430542	0.243673	0.0171381	0.00667115	0	0.178962	0	0.0523172	0	0.24558	0.990465
GSM1235029	0.0677587	0	0	0.0604722	0	0.107619	0	0.0968677	0	0.0104208	0	0.130274	0.022578	0	0.0930444	0.20439	0.0337267	0.0319234	0	0.0872782	0.0069406	0.0467063	0	0.345761	0.942976
GSM1235031	0	0.0556567	0.0346619	0.0436083	0	0.107507	0	0.0601846	0	0.0263388	0.0163414	0	0.0987394	0	0.0447865	0.255356	0.0340256	0.0499955	0	0.149132	0.0167862	0.00687897	0	0.215518	0.992694
GSM1235033	0.135937	0.0432006	0	0	0.142822	0.0214368	0.00167427	0.0897537	0	0.207177	0	0.00617714	0	0	0.0445106	0.0596058	0.0291702	0.0353743	0	0.150322	0.0193334	0.013504	0	0.285407	0.972959
GSM1235035	0.117428	0	0.0360431	0.0332165	0.0423445	0.0934676	0.0035032	0.0440735	0	0.0925069	0	0	0	0	0.0458976	0.219426	0	0.0278268	0	0.155092	0.0179872	0.071187	0	0.165837	1.01678
GSM1235037	0.045905	0	0	0.0273759	0.0386396	0.0233696	0.000223842	0.0771949	0	0.204233	0	0.0976199	0.00365066	0.125529	0.0928606	0.222209	0	0	0	0.0204006	0	0.0207887	0	0.449916	0.892811
GSM1235039	0.0314603	0	0.0312917	0.00973333	0.0120966	0.167262	0.000445021	0.0423566	0	0.146861	0	0.040194	0	0	0.0862697	0.227532	0.0490557	0	0	0.0318435	0.0494081	0.074191	0	0.40331	0.914405
GSM1235041	0.0104757	0	0.0529977	0.13788	0	0	0.0587253	0.070372	0	0.236207	0	0.0879581	0	0.0155053	0.0958921	0.166087	0.00903818	0	0	0.0446333	0	0.0142283	0	0.519224	0.854036
GSM1235043	0	0.0384951	0.0511526	0.016962	0	0.098503	0.0016668	0.128364	0	0.120904	0	0.0614973	0	0	0.0823819	0.237614	0.0229717	0.00410808	0	0.0183875	0.0311793	0.0858124	0	0.394407	0.91867
GSM1235045	0.0135287	0	0.00422931	0.0385374	0	0.0525704	0	0.0921912	0.00821836	0.150478	0	0.195137	0.00917878	0.00239549	0.0666649	0.15968	0.042066	0	0	0.15607	0.0053176	0.00373713	0	0.490423	0.873088
GSM1235047	0	0.0581043	0.0237336	0.187841	0	0	0.0179732	0.0699977	0.0750432	0.0232523	0	0.0154173	0	0	0.0574758	0.231724	0.0752464	0.0321597	0	0.0855425	0	0.0464887	0	0.217695	0.992978
GSM1235049	0	0.0191566	0.0189889	0.0223435	0	0.0636479	0	0.0220007	0.0123766	0.0656932	0.0224744	0	0.0402286	0.407026	0.0446813	0.151866	0.0354119	0	0	0.0587089	0	0.015396	0	0.767152	0.688347
GSM1235051	0	0.0494598	0	0.0310389	0	0.0334328	0	0.0278836	0.0712427	0.0804072	0	0.0114913	0	0	0.0373231	0.321386	0.0423957	0.0258253	0	0.111385	0.00255291	0.154175	0	0.268411	0.977262
GSM1235053	0	0.0717434	0.0764228	0.0833558	0	0.00786803	0.00156906	0.0536176	0.0505646	0.109609	0	0.0494362	0	0	0.0763615	0.151763	0.0470288	0	0	0.162266	0.0244757	0.0339176	0	0.38471	0.923758
GSM1235055	0	0.015705	0.0576414	0.176806	0	0.0760186	0	0.0623707	0.0173221	0	0	0.00628246	0	0	0.0230963	0.335348	0.0389332	0.0517465	0.0295786	0.0610305	0	0.0481209	0	0.235307	0.98565
GSM1235057	0	0.149798	0.133149	0.263913	0	0	0.0143758	0.0345889	0.0653428	0	0.0609491	0	0.0169525	0	0.0276978	0.134458	0.0313376	0	0.0376236	0	0	0.0298151	0	0.269667	0.981933
GSM1235059	0.00644669	0	0.0159645	0.272128	0	0	0.0234316	0.0337776	0.0548289	0.0519127	0	0	0	0	0.126207	0.138995	0.0670537	0.0383683	0	0.140829	0.012369	0.0176874	0	0.433301	0.900922
GSM1235061	0.0143996	0.040778	0.0183384	0.0244663	0	0.0205887	0	0.0875797	0.0476429	0.0821673	0	0.0163011	0	0.227481	0.06938	0.205581	0.0185082	0.0143212	0	0.079623	0	0.0328431	0	0.296634	0.965367
GSM1235062	0	0.0215315	0.0186027	0.0454371	0	0.0311605	0	0.114445	0.018053	0.126467	0	0.113	0.0556132	0	0.0896609	0.225116	0.021729	0.0101436	0	0.0458208	0.0234158	0.039804	0	0.438372	0.898172
GSM1235063	0.00532329	0	0.0021082	0.109945	0	0	0.00856156	0.0629838	0.0177916	0.197236	0	0.0589372	0.0529035	0.176096	0.092574	0.124405	0.0167563	0	0	0.0678738	0.00650462	0	0	0.465223	0.88445
GSM1235065	0.0382968	0	0.0380133	0.195994	0	0.0432668	0.00186258	0.106929	0	0.109407	0	0.0224534	0.00604671	0	0.123643	0.187907	0.0390178	0	0	0.0352255	0.0220325	0.0299042	0	0.352663	0.94027
GSM1235067	0.00460596	0	0.00347872	0.156738	0	0	0.0596583	0.0788753	0	0.292403	0	0.0374656	0	0	0.151636	0.140909	0	0.0403753	0.00666917	0	0	0.0271854	0	0.564256	0.825424
GSM1235069	0	0.0920201	0.0251786	0.173583	0	0	0.0074004	0.0268736	0.084982	0.0438466	0	0	0.0116444	0	0.0177107	0.288389	0	0.0790951	0	0.12277	0.00510069	0.0214057	0	0.28904	0.964092
GSM1235071	0	0.0114709	0.0111413	0.076356	0	0.058128	0	0.0804389	0.0124168	0.164667	0	0.100279	0	0	0.0837643	0.244472	0.0318583	0.00806352	0	0.0530747	0.0126178	0.0512521	0	0.449655	0.892759
GSM1235073	0.00727884	0	0.018135	0.00598839	0	0.0360446	0.0214492	0.0676143	0	0.248199	0	0.102092	0	0.0283339	0.163873	0.195274	0.00107002	0.0125502	0	0.0750768	0	0.0170213	0	0.554802	0.831985
GSM1235074	0	0.0431893	0.0494837	0.0787175	0	0	0	0.101688	0.0387842	0.132372	0	0.0215207	0	0	0.123716	0.21322	0.0157994	0	0	0.138509	0.00134172	0.0416584	0	0.388163	0.922645
GSM1235075	0.00606251	0	0.0374726	0.155812	0	0	0.130869	0.0321747	0	0.183873	0	0.0390574	0	0.0610123	0.0970513	0.182074	0.012388	0	0	0.0462268	0.00119092	0.0147362	0	0.55471	0.836759
GSM1235077	0.0425591	0	0.00389855	0.161295	0	0.0331124	0	0.0317397	0.0658342	0.0649404	0	0.015165	0	0	0.0645682	0.303789	0.0331486	0.0313889	0	0.0862972	0	0.0622645	0	0.41856	0.907366
GSM1235079	0	0.0114196	0.00949852	0.207416	0	0	0.0364899	0.0425642	0.111251	0	0.0574736	0.0990146	0.00610692	0	0.0548099	0.112116	0.156677	0	0.00913227	0.0454402	0	0.0405903	0	0.396136	0.919609
GSM1235081	0.06863	0.0448738	0	0.040759	0.0252091	0	0.0142895	0.0880909	0	0.132891	0	0.0149077	0	0	0.054927	0.185781	0.132292	0.0179359	0	0.111557	0.0188723	0.0489829	0	0.389221	0.920328
GSM1235083	0.00422994	0.0207086	0.0261888	0.116157	0.0342393	0	0	0.0597826	0.139495	0	0.0365466	0.0161024	0.0391372	0	0.0210765	0.241311	0.0464964	0.0301455	0	0.155719	0	0.0126638	0	0.16523	1.01785
GSM1235084	0.0757492	0	0.0432511	0.0396017	0	0.113627	0	0.0945867	0	0.0535421	0.0101387	0	0	0	0.0422643	0.272158	0.0247847	0.0500398	0	0.0818447	0.0207366	0.0776759	0	0.303761	0.956377
GSM1235085	0	0.136146	0.0483958	0.0593969	0.0506503	0	0.00464503	0.0913641	0	0.0756934	0	0.0471636	0	0	0.0319154	0.155012	0.0253717	0.0203702	0	0.190196	0.00947518	0.0542053	0	0.338612	0.945155
GSM1235087	0.129524	0.148457	0	0.0383283	0.0731058	0.0228361	0.000812868	0.100355	0	0.0999028	0	0.0220628	0	0	0.0226377	0.156693	0	0.0300732	0	0.106382	0.0125987	0.0362301	0	0.386716	0.923367
GSM1235089	0.0882836	0.0646727	0.00597471	0.0231021	0.0757965	0.0181777	0.00132518	0.0811223	0.00342244	0.124633	0	0.0157968	0	0.0047544	0.0827928	0.157175	0.0717078	0.00916744	0	0.0756	0.0357428	0.060753	0	0.407765	0.912294
GSM1235091	0	0.153997	0.0203319	0.168	0.0110062	0	0.0375917	0.111645	0	0.082324	0	0	0	0	0.0791487	0.0935519	0.0348138	0.00224746	0	0.18635	0.00460017	0.0143932	0	0.444098	0.895184
GSM1235092	0.0878665	0.0225531	0.0434099	0.0219185	0	0.0593946	0	0.113751	0.00956597	0.0491635	0	0.0222213	0.0373387	0	0.0845917	0.279406	0.0235796	0.0230592	0	0.0492792	0.0136043	0.0592971	0	0.377528	0.925584
GSM1235093	0.0249144	0.0204898	0.00410618	0.0833807	0	0.152283	0	0.0777525	0	0.0481641	0	0.101816	0.0169954	0	0.130823	0.152768	0.0379911	0	0	0.114991	0.00466649	0.0288579	0	0.330735	0.953338
GSM1235094	0.0634265	0	0.0438343	0.116453	0	0.041456	0	0.1281	0.0397392	0.0132799	0.018947	0	0	0.165594	0.0544197	0.189763	0.00772098	0.0178053	0	0.0757365	0	0.0237249	0	0.308958	0.956969
GSM1235095	0.0911631	0	0.0452295	0.0322675	0	0.0568113	0.0206749	0.0699123	0	0.184779	0	0.0238223	0.00893386	0.0582881	0.140389	0.138974	0.0264106	0.0138272	0	0.0727378	0	0.0157794	0	0.461687	0.886473
GSM1235096	0.0466079	0	0.0181397	0.231097	0	0.00730554	0	0.100246	0.0450373	0.0789289	0	0	0	0	0.0883144	0.167912	0.0738197	0.00988235	0	0.0883935	0	0.0443159	0	0.423003	0.90545
GSM1235097	0.00221532	0	0.00170616	0.153887	0	0	0.0468081	0.064887	0.00136657	0.262935	0	0.0831584	0	0.00356376	0.135438	0.140127	0.0284255	0	0	0.049932	0.015906	0.00964375	0	0.558457	0.829202
GSM1235098	0	0.0706941	0.0468643	0.0517139	0	0.0986091	0	0.131776	0	0.0901606	0.00411583	0	0	0	0.0726848	0.183606	0.0593572	0.0550735	0	0.105172	0.0158626	0.0143102	0	0.110577	1.03542
GSM1235099	0.00641994	0.11158	0.0430757	0	0	0.102087	0	0.137467	0.0333943	0.11622	0	0	0	0	0.0640612	0.215665	0.00409025	0.0451667	0	0.0727794	0.0195533	0.028441	0	0.233282	0.987189
GSM1235101	0	0.0427644	0.015073	0.00794221	0	0.0937143	0.0891841	0.0159086	0	0.19423	0	0	0	0	0.0240312	0.247921	0.0248512	0.0380689	0	0.127125	0.0128144	0.066372	0	0.448319	0.893705
GSM1235103	0.0160477	0.0138672	0.0169182	0.128202	0	0.0859881	0.0131473	0.0631993	0.0486803	0.0468922	0	0.00915503	0	0	0.0593816	0.238631	0.0479914	0.0576543	0	0.107417	0	0.0468276	0	0.321319	0.950466
GSM1235105	0	0.0340922	0.0332664	0.274305	0	0	0	0.065868	0.029751	0	0.00584343	0	0.0196815	0	0.111045	0.194617	0.0924333	0	0	0.115483	0	0.0236138	0	0.310545	0.956724
GSM1235107	0.114098	0	0.0180824	0	0	0.148848	0	0.080912	0	0.0681506	0	0.0594381	0.0250493	0	0.074362	0.181043	0.00537745	0.0306492	0	0.144867	0.00433242	0.0447902	0	0.165132	1.02026
GSM1235109	0.0155213	0	0.00471298	0	0	0.156688	0	0.0539367	0	0.178239	0	0.0682335	0	0.0319725	0.0598663	0.222309	0.0184728	0.0120801	0	0.129264	0	0.0487036	0	0.465523	0.884232
GSM1235111	0	0.0446682	0.0378704	0.000670554	0	0.217287	0.00232325	0.0681103	0	0.067322	0	0.0124307	0.0133687	0	0.0491005	0.321251	0.00859525	0.0449347	0.0242402	0.0321794	0	0.055648	0	0.298798	0.959086

## Sheet: GEOCibersortx
Sample	B cells naive	B cells memory	Plasma cells	T cells CD8	T cells CD4 naive	T cells CD4 memory resting	T cells CD4 memory activated	T cells follicular helper	T cells regulatory (Tregs)	T cells gamma delta	NK cells resting	NK cells activated	Monocytes	Macrophages M0	Macrophages M1	Macrophages M2	Dendritic cells resting	Dendritic cells activated	Mast cells resting	Mast cells activated	Eosinophils	Neutrophils	P-value	Correlation	RMSE
GSM1235025	0.0395178	0	0.0168651	0.110346	0	0.0850032	0	0.100226	0.0144176	0	0	0.00755379	0.0261166	0	0.0272046	0.387406	0.0338651	0.00928641	0	0.0964094	0.00734762	0.0384342
GSM1235096	0.0466079	0	0.0181397	0.231097	0	0.00730554	0	0.100246	0.0450373	0.0789289	0	0	0	0	0.0883144	0.167912	0.0738197	0.00988235	0	0.0883935	0	0.0443159
GSM1235063	0.00532329	0	0.0021082	0.109945	0	0	0.00856156	0.0629838	0.0177916	0.197236	0	0.0589372	0.0529035	0.176096	0.092574	0.124405	0.0167563	0	0	0.0678738	0.00650462	0
GSM1235105	0	0.0340922	0.0332664	0.274305	0	0	0	0.065868	0.029751	0	0.00584343	0	0.0196815	0	0.111045	0.194617	0.0924333	0	0	0.115483	0	0.0236138
GSM1235041	0.0104757	0	0.0529977	0.13788	0	0	0.0587253	0.070372	0	0.236207	0	0.0879581	0	0.0155053	0.0958921	0.166087	0.00903818	0	0	0.0446333	0	0.0142283
GSM1235017	0	0.0106468	0.00717364	0.1997	0	0	0.0151135	0.048734	0.00162277	0.195092	0	0.0921967	0.0457504	0.0683045	0.0630641	0.123213	0.0368975	0	0	0.0773134	0.00639434	0.00878343
GSM1235085	0	0.136146	0.0483958	0.0593969	0.0506503	0	0.00464503	0.0913641	0	0.0756934	0	0.0471636	0	0	0.0319154	0.155012	0.0253717	0.0203702	0	0.190196	0.00947518	0.0542053
GSM1235083	0.00422994	0.0207086	0.0261888	0.116157	0.0342393	0	0	0.0597826	0.139495	0	0.0365466	0.0161024	0.0391372	0	0.0210765	0.241311	0.0464964	0.0301455	0	0.155719	0	0.0126638
GSM1235057	0	0.149798	0.133149	0.263913	0	0	0.0143758	0.0345889	0.0653428	0	0.0609491	0	0.0169525	0	0.0276978	0.134458	0.0313376	0	0.0376236	0	0	0.0298151
GSM1235061	0.0143996	0.040778	0.0183384	0.0244663	0	0.0205887	0	0.0875797	0.0476429	0.0821673	0	0.0163011	0	0.227481	0.06938	0.205581	0.0185082	0.0143212	0	0.079623	0	0.0328431
GSM1235074	0	0.0431893	0.0494837	0.0787175	0	0	0	0.101688	0.0387842	0.132372	0	0.0215207	0	0	0.123716	0.21322	0.0157994	0	0	0.138509	0.00134172	0.0416584
GSM1235067	0.00460596	0	0.00347872	0.156738	0	0	0.0596583	0.0788753	0	0.292403	0	0.0374656	0	0	0.151636	0.140909	0	0.0403753	0.00666917	0	0	0.0271854
GSM1235051	0	0.0494598	0	0.0310389	0	0.0334328	0	0.0278836	0.0712427	0.0804072	0	0.0114913	0	0	0.0373231	0.321386	0.0423957	0.0258253	0	0.111385	0.00255291	0.154175
GSM1235069	0	0.0920201	0.0251786	0.173583	0	0	0.0074004	0.0268736	0.084982	0.0438466	0	0	0.0116444	0	0.0177107	0.288389	0	0.0790951	0	0.12277	0.00510069	0.0214057
GSM1235068	0	0.0927198	0.0183398	0.119349	0	0.0275427	0.0673092	0.0721187	0	0.0477961	0.0274249	0	0.00883801	0	0.0696802	0.176338	0.0416834	0.0325751	0	0.104712	0.0537033	0.0398702
GSM1235101	0	0.0427644	0.015073	0.00794221	0	0.0937143	0.0891841	0.0159086	0	0.19423	0	0	0	0	0.0240312	0.247921	0.0248512	0.0380689	0	0.127125	0.0128144	0.066372
GSM1235084	0.0757492	0	0.0432511	0.0396017	0	0.113627	0	0.0945867	0	0.0535421	0.0101387	0	0	0	0.0422643	0.272158	0.0247847	0.0500398	0	0.0818447	0.0207366	0.0776759
GSM1235073	0.00727884	0	0.018135	0.00598839	0	0.0360446	0.0214492	0.0676143	0	0.248199	0	0.102092	0	0.0283339	0.163873	0.195274	0.00107002	0.0125502	0	0.0750768	0	0.0170213
GSM1235045	0.0135287	0	0.00422931	0.0385374	0	0.0525704	0	0.0921912	0.00821836	0.150478	0	0.195137	0.00917878	0.00239549	0.0666649	0.15968	0.042066	0	0	0.15607	0.0053176	0.00373713
GSM1235093	0.0249144	0.0204898	0.00410618	0.0833807	0	0.152283	0	0.0777525	0	0.0481641	0	0.101816	0.0169954	0	0.130823	0.152768	0.0379911	0	0	0.114991	0.00466649	0.0288579
GSM1235053	0	0.0717434	0.0764228	0.0833558	0	0.00786803	0.00156906	0.0536176	0.0505646	0.109609	0	0.0494362	0	0	0.0763615	0.151763	0.0470288	0	0	0.162266	0.0244757	0.0339176
GSM1235062	0	0.0215315	0.0186027	0.0454371	0	0.0311605	0	0.114445	0.018053	0.126467	0	0.113	0.0556132	0	0.0896609	0.225116	0.021729	0.0101436	0	0.0458208	0.0234158	0.039804
GSM1235094	0.0634265	0	0.0438343	0.116453	0	0.041456	0	0.1281	0.0397392	0.0132799	0.018947	0	0	0.165594	0.0544197	0.189763	0.00772098	0.0178053	0	0.0757365	0	0.0237249
GSM1235047	0	0.0581043	0.0237336	0.187841	0	0	0.0179732	0.0699977	0.0750432	0.0232523	0	0.0154173	0	0	0.0574758	0.231724	0.0752464	0.0321597	0	0.0855425	0	0.0464887
GSM1235098	0	0.0706941	0.0468643	0.0517139	0	0.0986091	0	0.131776	0	0.0901606	0.00411583	0	0	0	0.0726848	0.183606	0.0593572	0.0550735	0	0.105172	0.0158626	0.0143102
GSM1235097	0.00221532	0	0.00170616	0.153887	0	0	0.0468081	0.064887	0.00136657	0.262935	0	0.0831584	0	0.00356376	0.135438	0.140127	0.0284255	0	0	0.049932	0.015906	0.00964375
GSM1235103	0.0160477	0.0138672	0.0169182	0.128202	0	0.0859881	0.0131473	0.0631993	0.0486803	0.0468922	0	0.00915503	0	0	0.0593816	0.238631	0.0479914	0.0576543	0	0.107417	0	0.0468276
GSM1235087	0.129524	0.148457	0	0.0383283	0.0731058	0.0228361	0.000812868	0.100355	0	0.0999028	0	0.0220628	0	0	0.0226377	0.156693	0	0.0300732	0	0.106382	0.0125987	0.0362301
GSM1235065	0.0382968	0	0.0380133	0.195994	0	0.0432668	0.00186258	0.106929	0	0.109407	0	0.0224534	0.00604671	0	0.123643	0.187907	0.0390178	0	0	0.0352255	0.0220325	0.0299042
GSM1235071	0	0.0114709	0.0111413	0.076356	0	0.058128	0	0.0804389	0.0124168	0.164667	0	0.100279	0	0	0.0837643	0.244472	0.0318583	0.00806352	0	0.0530747	0.0126178	0.0512521
GSM1235049	0	0.0191566	0.0189889	0.0223435	0	0.0636479	0	0.0220007	0.0123766	0.0656932	0.0224744	0	0.0402286	0.407026	0.0446813	0.151866	0.0354119	0	0	0.0587089	0	0.015396
GSM1235075	0.00606251	0	0.0374726	0.155812	0	0	0.130869	0.0321747	0	0.183873	0	0.0390574	0	0.0610123	0.0970513	0.182074	0.012388	0	0	0.0462268	0.00119092	0.0147362
GSM1235043	0	0.0384951	0.0511526	0.016962	0	0.098503	0.0016668	0.128364	0	0.120904	0	0.0614973	0	0	0.0823819	0.237614	0.0229717	0.00410808	0	0.0183875	0.0311793	0.0858124
GSM1235111	0	0.0446682	0.0378704	0.000670554	0	0.217287	0.00232325	0.0681103	0	0.067322	0	0.0124307	0.0133687	0	0.0491005	0.321251	0.00859525	0.0449347	0.0242402	0.0321794	0	0.055648
GSM1235055	0	0.015705	0.0576414	0.176806	0	0.0760186	0	0.0623707	0.0173221	0	0	0.00628246	0	0	0.0230963	0.335348	0.0389332	0.0517465	0.0295786	0.0610305	0	0.0481209
GSM1235021	0.0288197	0	0.0236734	0.0544468	0	0.028443	0	0.105032	0	0.269142	0	0.122581	0	0.0104875	0.112047	0.139255	0.00470625	0.0116633	0	0.0793253	0	0.0103783
GSM1235037	0.045905	0	0	0.0273759	0.0386396	0.0233696	0.000223842	0.0771949	0	0.204233	0	0.0976199	0.00365066	0.125529	0.0928606	0.222209	0	0	0	0.0204006	0	0.0207887
GSM1235092	0.0878665	0.0225531	0.0434099	0.0219185	0	0.0593946	0	0.113751	0.00956597	0.0491635	0	0.0222213	0.0373387	0	0.0845917	0.279406	0.0235796	0.0230592	0	0.0492792	0.0136043	0.0592971
GSM1235039	0.0314603	0	0.0312917	0.00973333	0.0120966	0.167262	0.000445021	0.0423566	0	0.146861	0	0.040194	0	0	0.0862697	0.227532	0.0490557	0	0	0.0318435	0.0494081	0.074191
GSM1235109	0.0155213	0	0.00471298	0	0	0.156688	0	0.0539367	0	0.178239	0	0.0682335	0	0.0319725	0.0598663	0.222309	0.0184728	0.0120801	0	0.129264	0	0.0487036
GSM1235059	0.00644669	0	0.0159645	0.272128	0	0	0.0234316	0.0337776	0.0548289	0.0519127	0	0	0	0	0.126207	0.138995	0.0670537	0.0383683	0	0.140829	0.012369	0.0176874
GSM1235095	0.0911631	0	0.0452295	0.0322675	0	0.0568113	0.0206749	0.0699123	0	0.184779	0	0.0238223	0.00893386	0.0582881	0.140389	0.138974	0.0264106	0.0138272	0	0.0727378	0	0.0157794
GSM1235019	0	0.0285391	0.0200571	0.0104707	0	0.117457	0	0.0488913	0	0.0134742	0	0.0591478	0.0998766	0	0.0174345	0.256562	0.00219873	0.04564	0	0.202501	0.026578	0.0511719
GSM1235029	0.0677587	0	0	0.0604722	0	0.107619	0	0.0968677	0	0.0104208	0	0.130274	0.022578	0	0.0930444	0.20439	0.0337267	0.0319234	0	0.0872782	0.0069406	0.0467063
GSM1235020	0.0350607	0	0.0246531	0.0751423	0	0.174391	0.00709394	0.0385048	0	0.070261	0.00363642	0.0275227	0.0151563	0	0.0768609	0.136053	0.0495385	0.0670441	0	0.140859	0.0266578	0.0315646
GSM1235027	0.0395059	0	0.0483029	0.0144101	0	0.110446	0	0.0379692	0.0156157	0.11213	0	0.0798046	0	0	0.0430542	0.243673	0.0171381	0.00667115	0	0.178962	0	0.0523172
GSM1235107	0.114098	0	0.0180824	0	0	0.148848	0	0.080912	0	0.0681506	0	0.0594381	0.0250493	0	0.074362	0.181043	0.00537745	0.0306492	0	0.144867	0.00433242	0.0447902
GSM1235035	0.117428	0	0.0360431	0.0332165	0.0423445	0.0934676	0.0035032	0.0440735	0	0.0925069	0	0	0	0	0.0458976	0.219426	0	0.0278268	0	0.155092	0.0179872	0.071187
GSM1235033	0.135937	0.0432006	0	0	0.142822	0.0214368	0.00167427	0.0897537	0	0.207177	0	0.00617714	0	0	0.0445106	0.0596058	0.0291702	0.0353743	0	0.150322	0.0193334	0.013504
GSM1235031	0	0.0556567	0.0346619	0.0436083	0	0.107507	0	0.0601846	0	0.0263388	0.0163414	0	0.0987394	0	0.0447865	0.255356	0.0340256	0.0499955	0	0.149132	0.0167862	0.00687897
GSM1235023	0.00244267	0	0.00444124	0	0	0.0336725	0	0.0142302	0.0146484	0.0845532	0	0.00652425	0	0.580549	0.0264266	0.103382	0.0125923	0	0	0.0981469	0	0.0183911
GSM1235024	0.0429245	0	0.0211886	0.114455	0	0.0563051	0.000574404	0.0917484	0	0.0965843	0	0.00221291	0.0338134	0	0.0391885	0.206237	0	0.0666984	0	0.147928	0.0204396	0.0597021
GSM1235022	0.0233045	0	0.0199381	0.0247396	0	0.138449	0.0304954	0.0170172	0	0.148033	0	0.00174988	0	0.0782468	0.00566373	0.126118	0.0181845	0.0894841	0	0.13484	0.0785446	0.0651912
GSM1235048	0.0317703	0	0.0244697	0	0.0194614	0.167691	0	0.0504911	0	0.106138	0.00378786	0	0.101334	0.0917947	0.037896	0.103756	0.0412566	0.03547	0.00523558	0.108321	0.0170067	0.05412
GSM1235018	0.00349945	0	0.0140388	0	0.000484894	0.0983988	0	0.0207924	0	0.0487719	0	0.0311207	0.0798193	0.0554937	0.0316136	0.0936905	0.0112549	0.0269343	0	0.389865	0.0334481	0.0607739
GSM1235070	0.00391975	0.00731709	0.0177908	0.106948	0	0.127075	0.0211701	0.0395744	0	0.0399844	0	0.00845237	0.0357965	0	0.0764718	0.185266	0.0936482	0.0495073	0	0.0593448	0.0559226	0.0718108
GSM1235072	0	0.0189297	0.0111474	0	0.0593794	0.150166	0.0579873	0.0116187	0	0	0.210772	0	0.108397	0.048984	0.0558919	0.104684	0.0264127	0.0284203	0	0.051572	0.0432773	0.0123602
GSM1235026	0.0135389	0	0.0188192	0.0571663	0	0.109537	0.0269683	0.0235493	0	0.0733419	0	0.0858669	0.0619746	0.0138443	0.0509963	0.0785934	0.0217605	0.0378621	0	0.252668	0.0208419	0.0526707
GSM1235089	0.0882836	0.0646727	0.00597471	0.0231021	0.0757965	0.0181777	0.00132518	0.0811223	0.00342244	0.124633	0	0.0157968	0	0.0047544	0.0827928	0.157175	0.0717078	0.00916744	0	0.0756	0.0357428	0.060753
GSM1235081	0.06863	0.0448738	0	0.040759	0.0252091	0	0.0142895	0.0880909	0	0.132891	0	0.0149077	0	0	0.054927	0.185781	0.132292	0.0179359	0	0.111557	0.0188723	0.0489829
GSM1235044	0.0174785	0	0.0209175	0	0	0.218425	0.00790912	0.0326664	0	0.0853182	0.0621685	0	0.0307294	0	0.018983	0.15814	0.0502288	0.054875	0	0.163828	0.0582026	0.0201299
GSM1235076	0.0146133	0.010177	0.00132798	0.149368	0	0.0851209	0.0235141	0.00101079	0	0.0214685	0.0552638	0	0.0518633	0	0.0547205	0.141375	0.156079	0.0394416	0	0.0469782	0.0379774	0.109701
GSM1235099	0.00641994	0.11158	0.0430757	0	0	0.102087	0	0.137467	0.0333943	0.11622	0	0	0	0	0.0640612	0.215665	0.00409025	0.0451667	0	0.0727794	0.0195533	0.028441
GSM1235088	0	0.00244786	0.0221682	0.105571	0	0.167961	0.0058761	0.0176015	0	0	0	0.016345	0.0574442	0	0.0359429	0.1163	0.102034	0.0407044	0	0.210378	0.0617586	0.037467
GSM1235036	0	0.0267779	0.0232247	0.0475012	0	0.141733	0	0.023022	0	0.0792518	0.0176395	0.0163853	0.0492072	0.0207081	0.0732924	0.143677	0.0270855	0.0235245	0	0.184915	0.0432892	0.0587651
GSM1235050	0.00122118	0.00481089	0.0139749	0.0152988	0	0.0734	0	0.045204	0	0.0630186	0	0.0354182	0.125291	0.0783447	0.0338015	0.107633	0.0322325	0.0463203	0	0.169117	0.0544685	0.100444
GSM1235054	0.0253304	0	0.0179319	0	0.0323007	0.0753648	0	0.0482429	0	0.074719	0.0326021	0.0190785	0.0530572	0.0850972	0.0232011	0.112401	0.0481574	0.0423194	0	0.219661	0.0160366	0.0744988
GSM1235077	0.0425591	0	0.00389855	0.161295	0	0.0331124	0	0.0317397	0.0658342	0.0649404	0	0.015165	0	0	0.0645682	0.303789	0.0331486	0.0313889	0	0.0862972	0	0.0622645
GSM1235016	0.0804463	0	0.020912	0.00639891	0.0139436	0.0912545	0.041692	0.0624661	0	0.155042	0	0	0.0298527	0	0.0384079	0.140674	0.0137593	0.0363218	0	0.153652	0.0422241	0.0729518
GSM1235079	0	0.0114196	0.00949852	0.207416	0	0	0.0364899	0.0425642	0.111251	0	0.0574736	0.0990146	0.00610692	0	0.0548099	0.112116	0.156677	0	0.00913227	0.0454402	0	0.0405903
GSM1235080	0.0156143	0.00230137	0.00298817	0.158894	0	0.0540188	0.0131417	0.0285913	0	0.0454213	0.052653	0	0.0532001	0	0.0283861	0.189995	0.114013	0.0512292	0	0.0767035	0.0300669	0.0827824
GSM1235086	0.0154149	0	0.00922642	0.104814	0	0.225173	0	0.0238891	0	0.0458916	0.0164112	0.0450301	0.0647288	0	0.0305904	0.119994	0.0389468	0.0330596	0	0.170993	0.046436	0.00940075
GSM1235042	0.0540834	0	0.0275769	0	0.0209412	0.199312	0.00272937	0.0179805	0	0.119188	0	0.00454538	0.0728587	0	0.0588143	0.116758	0.0371074	0.0322534	0.00298797	0.139341	0.0495277	0.0439954
GSM1235028	0.0092966	0	0.0248015	0	0.000440021	0.212186	0.00716959	0.036437	0	0.0987979	0	0.0285915	0.164877	0.0352641	0.064486	0.0429911	0.0223587	0.0293177	0.0229888	0.0498224	0.0274166	0.122757
GSM1235038	0.00661905	0	0.012263	0	0.0137772	0.177359	0.0190944	0.0193556	0	0.10989	0.0564113	0.0159368	0.0281731	0.0324348	0.0619451	0.184186	0.0282046	0.0176332	0.0661914	0	0.0874439	0.0630812
GSM1235078	0.0309213	0	0.00810257	0.202653	0	0.0781702	0.0347963	0.00488817	0	0	0	0	0.0292917	0	0.0734124	0.207218	0.139072	0.0277056	0	0.0679817	0.0406461	0.055141
GSM1235034	0.0411256	0	0.0302931	0	0	0.0959488	0.0396602	0	0	0.0506899	0.0656109	0	0.12482	0.0430853	0.031379	0.0931447	0.04052	0.0439746	0	0.0874716	0.0430352	0.169241
GSM1235064	0.0464563	0	0.0026184	0.16164	0	0.108968	0.0073716	0.0407986	0	0	0.043868	0	0.110223	0.00559102	0.0403739	0.136372	0.0991705	0.0655412	0	0.0551141	0.0326763	0.0432176
GSM1235056	0.0451719	0	0.0221834	0	0.0442777	0.123356	0.0369798	0.0718637	0	0.118842	0	0.017682	0.118667	0	0.0478696	0.0702571	0.060175	0.0444964	0	0.101926	0.0249289	0.0513236
GSM1235030	0	0.032646	0.0160289	0	0.0797949	0.0627766	0.0453669	0.0602054	0	0.0194594	0.116102	0.0290517	0.0310296	0.0292755	0.0706568	0.124236	0.0266484	0.0344683	0	0.1373	0.0510146	0.0339389
GSM1235060	0.00955101	0.00856085	0.016632	0.0717255	0	0.163909	0.00105831	0.0267812	0	0.115591	0	0	0.0448128	0	0.0270929	0.219933	0.0582104	0.0509371	0	0.0557824	0.0708256	0.0585972
GSM1235082	0	0.109991	0.00761407	0.136843	0	0	0.0293777	0.0346745	0	0.0564592	0	0.0309701	0.0080005	0	0.0388778	0.162703	0.0789564	0.0599482	0	0.0847786	0.056259	0.104547
GSM1235090	0.0736628	0	0	0.242931	0	0	0.00461809	0	0.021181	0.0670424	0	0	0.0228103	0	0.0387632	0.239109	0.0735186	0.0977985	0.013931	0.0535166	0.0185737	0.032544
GSM1235058	0.010963	0.013281	0.0119018	0.0964917	0	0.0866714	0.0191506	0.0293813	0	0.0578793	0	0.030454	0.0260712	0	0.112427	0.186031	0.122939	0.0252347	0	0.0946613	0.0212635	0.0551986
GSM1235032	0.0197593	0	0.026215	0.0404987	0	0.284369	0	0.0314583	0	0	0	0.0766313	0.00721793	0	0.0311734	0.16687	0.0477095	0.0973511	0.0052554	0.0661809	0.0584248	0.0408861
GSM1235052	0	0.0468507	0.0240044	0.0890337	0	0.0974826	0	0.0906609	0	0.025414	0.0487472	0	0.0217306	0	0.0804382	0.144942	0.0780939	0.0563967	0	0.0720799	0.0473765	0.0767488
GSM1235046	0	0.0210401	0.0347121	0.0817112	0	0.159278	0	0.0632069	0.0457444	0	0.0113764	0.0177991	0.0274555	0	0.0628821	0.181886	0.0148365	0.0688744	0	0.077485	0.066535	0.0651774
GSM1235040	0	0.0117865	0.0358415	0.0547414	0	0.153151	0.0029048	0.0561112	0	0.0639648	0.00538647	0.0408968	0.103303	0	0.0404007	0.195487	0.0444844	0.0524572	0	0.06213	0.0660584	0.0108953
GSM1235091	0	0.153997	0.0203319	0.168	0.0110062	0	0.0375917	0.111645	0	0.082324	0	0	0	0	0.0791487	0.0935519	0.0348138	0.00224746	0	0.18635	0.00460017	0.0143932
GSM1235066	5.43747e-05	0.0411818	0	0.245689	0	0.0212755	0.028492	0	0	0	0	0.00230136	0.0370353	0	0.0150671	0.223244	0.0466403	0.104676	0	0.131427	0.0580908	0.0448255
